# Supplementary material for: The First Cellular Models Based on Frataxin Missense Mutations That Reproduce Spontaneously the Defects Associated with Friedreich Ataxia
Source: PubMed Central journal article supplement (PMC2710521; doi:10.1371/journal.pone.0006379), 2009-07-24

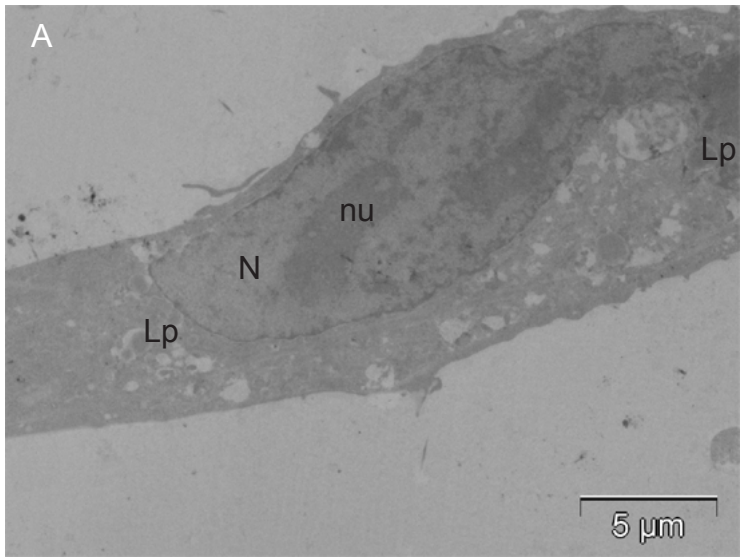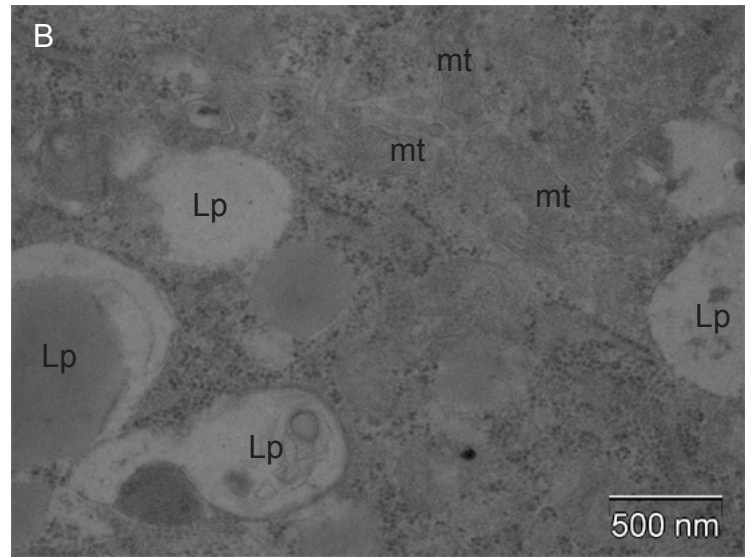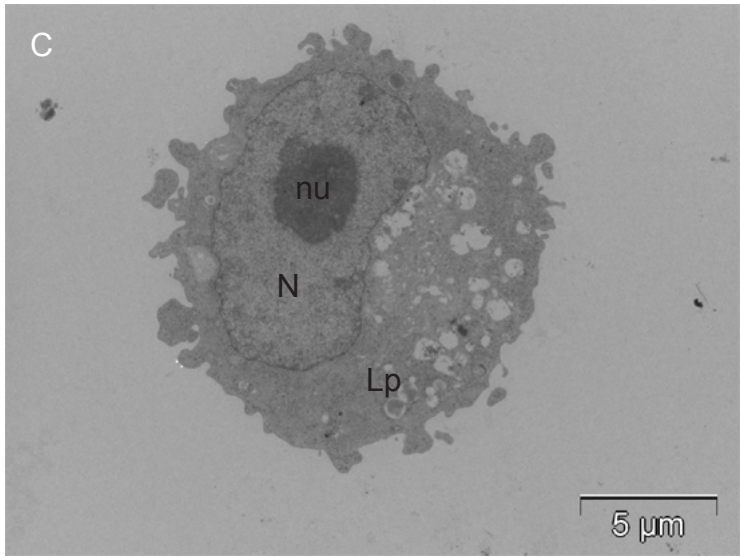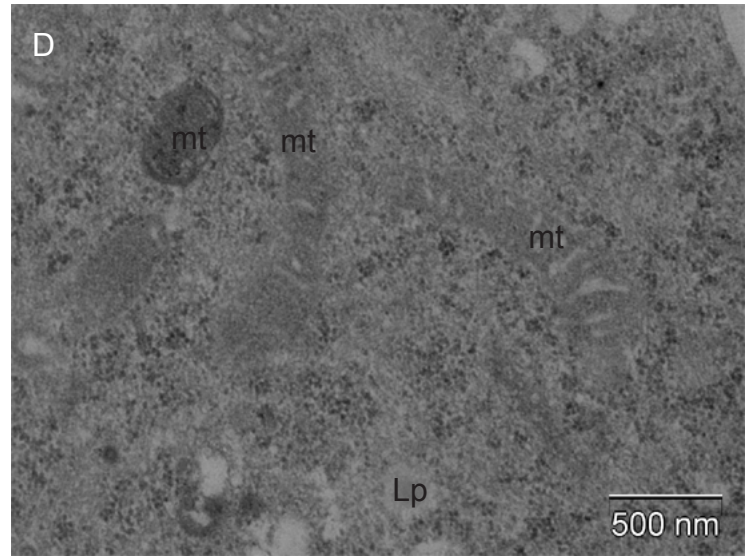

Supplement: pone.0006379.s003.pdf [file pone.0006379.s003.pdf]
